# Supplementary material for: Multi-robot cooperation for lunar In-Situ resource utilization
Source: Frontiers journal article supplement (doi:10.3389/frobt.2023.1149080), 2023-03-23
Supplement: Data_Sheet_1.pdf [file Data_Sheet_1.pdf]

## Supplementary Material

### 1 SUPPLEMENTARY TABLES AND FIGURES

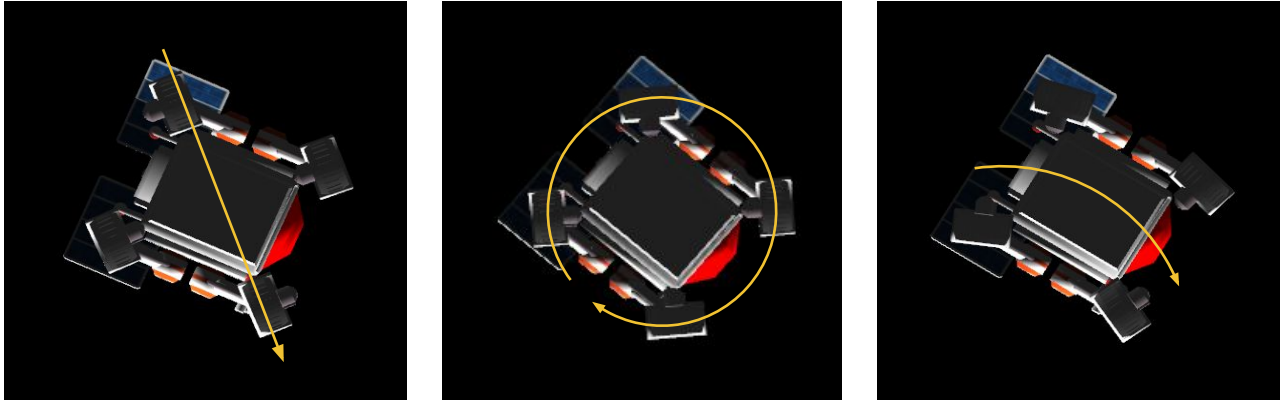

**Figure S1.** Locomotion Modes. (A) Pure translation mode. (B) Pure rotation mode. (C) Double Ackermann steering.

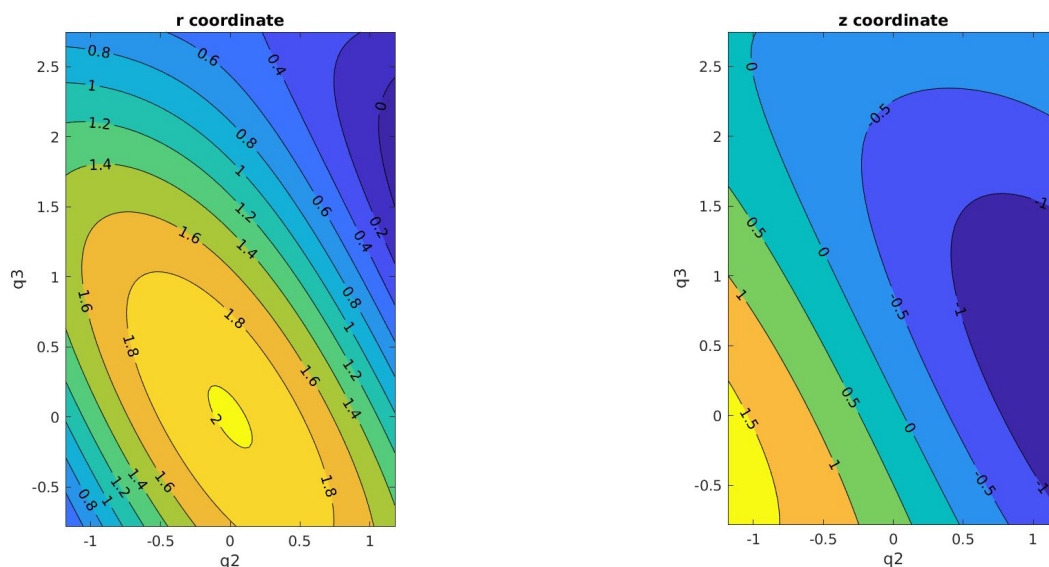

**Figure S2.** Workspace of the Excavator's arm was parameterized by the shoulder ( $q_2$ ) and elbow pitch ( $q_3$ ) joints. This allowed for quick checking if a desired goal for the arm is reachable and if the Hauler needs to park again. (A) Radial range map ( $r$  coordinate). (B) Height map ( $z$  coordinate).

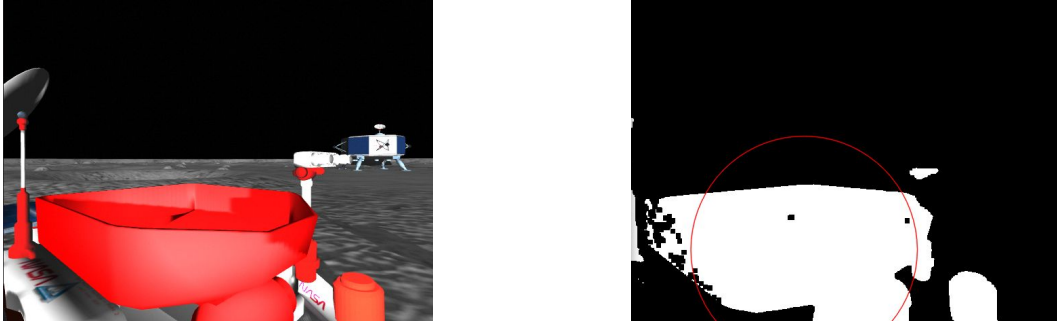

**Figure S3.** Detection of the Hauler's bin. The Excavator finds the Hauler bin by processing the original RGB image using color segmentation. **(A)** RGB Image captured by the Excavator. **(B)** Detector mask.

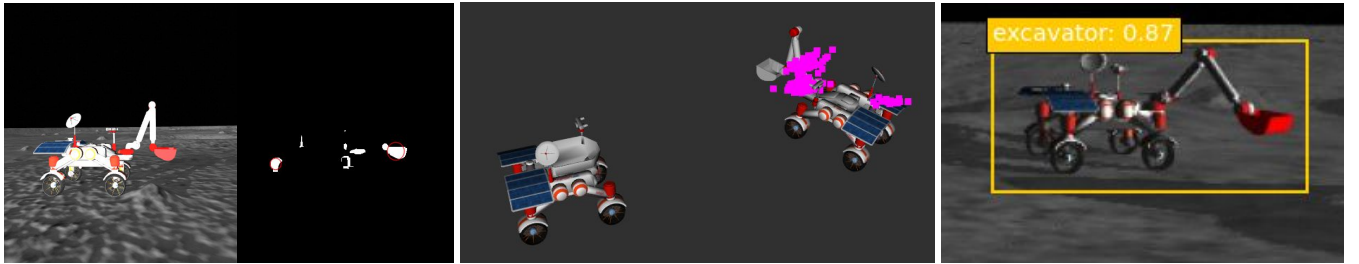

**Figure S4.** Methods for estimation of the relative 3D position between Hauler and Excavator. **(A)** Using blob detection and depth image segmentation. **(B)** Using an assemble of filtered laser scans. **(C)** Using a real-time object detection system and depth image segmentation.

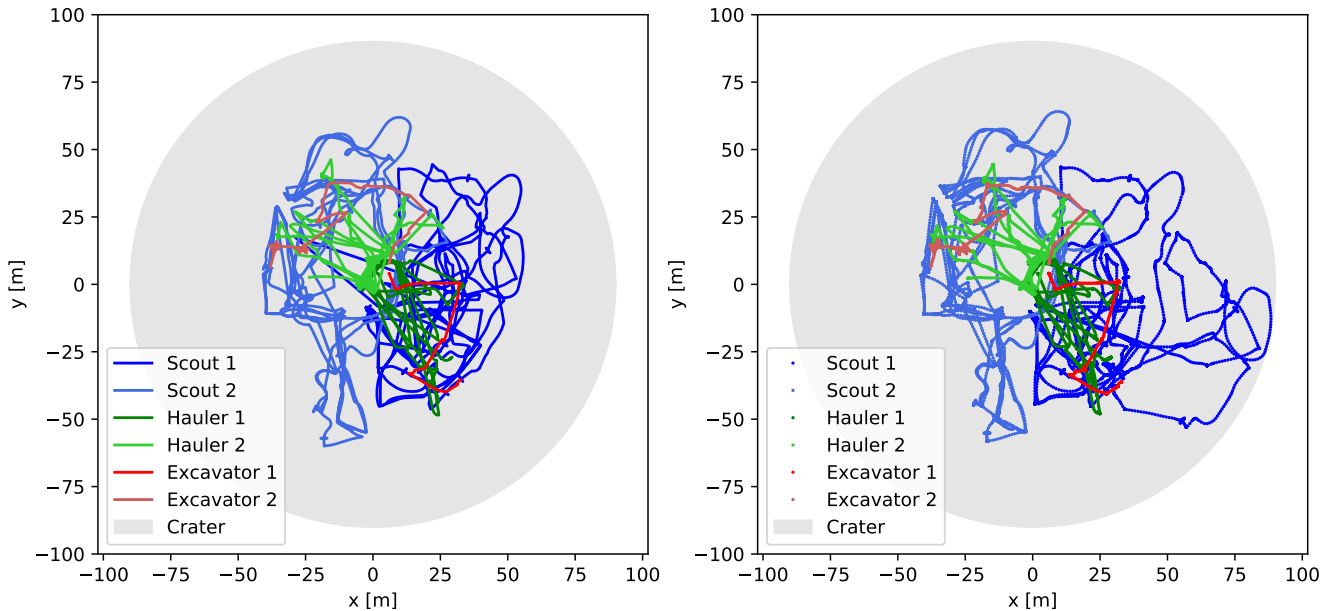

**Figure S5.** Comparison between **(A)** our localization estimate and **(B)** the localization truth for a two-hours mission for multiple robots.
